# Supplementary material for: Pure-color and dual-color emission from BODIPY homopolymers containing the cardo boron structure
Source: Royal Society of Chemistry journal article supplement (doi:10.1039/c8py00619a), 2018-01-01
Supplement: c8py00619a1.pdf [file c8py00619a1.pdf]

*Supporting Information*

# Pure-Color and Dual-Color Emission from BODIPY Homopolymers Containing the Cardo Boron Structure

*Honami Yamane, Kazuo Tanaka\* and Yoshiki Chujo\**

*Department of Polymer Chemistry, Graduate School of Engineering, Kyoto University, Katsura,  
Nishikyo-ku, Kyoto 615-8510, Japan*

Corresponding author E-mail: [kazuo123@chujo.synchem.kyoto-u.ac.jp](mailto:kazuo123@chujo.synchem.kyoto-u.ac.jp); [chujo@chujo.synchem.kyoto-u.ac.jp](mailto:chujo@chujo.synchem.kyoto-u.ac.jp)

Tel: (+81)-75-383-2604. Fax: (+81)-75-383-2605

## Experimental Section

**General:**  $^1\text{H}$  (400 MHz),  $^{13}\text{C}$  (100 MHz) and  $^{11}\text{B}$  (128 MHz) NMR spectra were recorded on a JEOL JNM EX400 spectrometer.  $^{11}\text{B}$  NMR spectra were referenced externally to  $\text{BF}_3\cdot\text{OEt}_2$  (sealed capillary). Analytical thin-layer chromatography (TLC) was performed with silica gel 60 Merck F254 plates. Column chromatography was performed with Wakogel C-300 silica gel. Number-average molecular weight ( $M_n$ ) and molecular weight distribution ( $M_w/M_n$ ) values of all polymers were estimated by size exclusion chromatography (SEC) with a TOSOH 8020 series [a dual pump system (DP-8020), a column oven (CO-8020), and a degasser (SD-8020)] equipped with three consecutive polystyrene gel columns [TOSOH TSKgel: G2000H, G3000H and G4000H] and refractive-index (RI-8020) and ultraviolet detectors (UV-8020) at 40 °C. The system was operated at a flow rate of 1.0 mL/min with  $\text{CHCl}_3$  as an eluent. Polystyrene standards were employed for calibration. UV-vis spectra were recorded on a Shimadzu UV-3600 spectrophotometer. Fluorescence emission spectra were recorded on a HORIBA JOBIN YVON Fluoromax-4 spectrofluorometer, and the absolute quantum yield was calculated by integrating sphere method on the HORIBA JOBIN YVON Fluoromax-4 spectrofluorometer in chloroform.

**Synthesis of B2Br:** *n*-BuLi (5.2 mL, 1.63 mol/L in hexane) was added to the solution of 1-bromo-4-iodobenzene (2.4 g, 8.5 mmol) in diethyl ether (16 mL) at  $-78$  °C under argon atmosphere. The reaction mixture was stirred for 0.5 h at  $-78$  °C and for 0.5 h at room temperature. Then, the solution of **B0** (0.8 g, 2.1 mmol in 18 mL of diethyl ether) was added to the reaction mixture via cannula at  $-78$  °C. After the reaction mixture was stirred for 0.5 h at  $-78$  °C, methanol was added. The solution was extracted with dichloromethane and washed with water and brine. After the organic phase was dried over  $\text{MgSO}_4$ , the solvent was removed by a rotary evaporator. The silica gel column chromatography with hexane/dichloromethane (9:1) gave **B2Br** as an orange solid (0.41 g, 0.63 mmol, 30 %).  $^1\text{H}$  NMR ( $\text{CDCl}_3$ ):  $\delta$  = 7.31 (4H, d,  $J$  = 8.3 Hz), 7.08 (4H, br), 6.00 (2H, s), 3.03 (2H, d,  $J$  = 8.3 Hz), 2.45 (6H, s), 1.70 (6H, s), 1.67–1.59 (2H, m), 1.42–1.39 (2H,

m), 1.30–1.27 (10H, m), 0.88 (3H, t,  $J = 6.8$  Hz)  $^{13}\text{C}$  NMR ( $\text{CDCl}_3$ ):  $\delta = 152.7, 147.7, 138.0, 135.3, 131.9, 130.3, 122.7, 122.6, 120.2, 32.3, 31.9, 30.1, 29.5, 29.3, 28.6, 22.6, 17.1, 16.9, 16.9, 14.1$  ppm.  $^{11}\text{B}$  NMR ( $\text{CDCl}_3$ ):  $\delta = -0.98$  (br) ppm. HRMS (ESI): Calcd. for  $[\text{M}+\text{H}]^+$ , 647.1802; found,  $m/z$  647.1786.

**Synthesis of B2A:** Water (8.0 mL) was added to the solution of **B2Br** (0.50 g, 0.77 mmol), 10-phenyl-9-anthraceneboronic acid (1.9 g, 3.5 mmol),  $\text{Pd}_2(\text{dba})_3$  (14 mg, 15  $\mu\text{mol}$ ), S-Phos (56 mg, 0.14 mmol) and cesium carbonate (5.0 g, 15 mmol) in toluene (8.0 mL). The reaction mixture was stirred at 80 °C for 24 h under argon atmosphere. The solution was extracted with toluene and washed with water and brine. After the organic phase was dried over  $\text{MgSO}_4$ , the solvent was removed by a rotary evaporator. The product was purified by column chromatography with hexane/dichloromethane (4:1). The isolated product was dissolved in a small amount of  $\text{CH}_2\text{Cl}_2$ , and the product was precipitated from methanol to give pure **B2A** as an orange solid (0.49 g, 64%).  $^1\text{H}$  NMR ( $\text{CDCl}_3$ ):  $\delta = 7.81$  (4H, dd,  $J = 7.2, 3.1$  Hz), 7.69–7.48 (18H, m), 7.37 (4H, d,  $J = 7.8$  Hz), 7.32–7.31 (8H, m), 6.18 (2H, s), 3.19 (2H, t,  $J = 8.3$  Hz), 2.59 (6H, s), 2.15 (6H, s), 1.79–1.77 (2H, m), 1.54–1.51 (2H, m), 1.36–1.28 (10H, m), 0.86 (3H, t,  $J = 6.96$  Hz) ppm.  $^{13}\text{C}$  NMR ( $\text{CDCl}_3$ ):  $\delta = 158.1, 149.2, 147.7, 139.4, 138.4, 137.8, 136.5, 136.0, 133.7, 132.2, 131.4, 130.2, 130.0, 130.0, 128.4, 127.4, 127.3, 126.8, 124.9, 124.6, 122.6, 32.4, 31.8, 30.8, 30.3, 29.6, 29.3, 28.8, 22.6, 17.4, 17.0, 14.0$  ppm.  $^{11}\text{B}$  NMR ( $\text{CDCl}_3$ ):  $\delta = -0.20$  (br) ppm. HRMS (APCI): Calcd. for  $[\text{M}+\text{H}]^+$ , 995.5470; found,  $m/z$  995.5465.

**Synthesis of PB0:**  $\text{BF}_3 \cdot \text{OEt}_2$  (0.33 mL, 0.38 g, 2.7 mmol) was added to a solution of **B0** (0.10 g, 0.27 mmol) and PIFA (0.23 g, 0.53 mmol) in  $\text{CH}_2\text{Cl}_2$  (2.0 mL) at  $-78$  °C, and the solution was stirred at  $-78$  °C for 1 h. The solution was poured into MeOH (25 mL) and triethylamine (3 mL) to collect desired polymer by filtration. The precipitate was dissolved in a small amount of THF, and further reprecipitated from a large excess of EtOH twice to give **PB0** as a metallic red solid (81 mg, 81%).  $M_n = 14,000$ ,  $M_w/M_n = 4.1$ .  $^1\text{H}$  NMR ( $\text{CDCl}_3$ ):  $\delta = 3.68$ – $1.06$  (28H, m), 0.96–0.82 (3H, m) ppm.  $^{11}\text{B}$  NMR ( $\text{CDCl}_3$ ):  $\delta = 0.59$  (br) ppm.

**Synthesis of PB2:**  $\text{BF}_3 \cdot \text{OEt}_2$  (0.35 mL, 0.41 g, 2.9 mmol) was added to a solution of **B2** (0.14 g, 0.29 mmol) and PIFA (0.25 g, 0.57 mmol) in  $\text{CH}_2\text{Cl}_2$  (2.1 mL) at  $-78^\circ\text{C}$ , and the solution was stirred at  $-78^\circ\text{C}$  for 20 h. The solution was poured into MeOH (30 mL) and triethylamine (3 mL) to collect desired polymer by filtration. The precipitate was dissolved in a small amount of THF, and further reprecipitated from a large excess of EtOH twice to give **PB2** as a purplish red solid (62 mg, 45%).  $M_n = 11,000$ ,  $M_w/M_n = 2.6$ .  $^1\text{H NMR}$  ( $\text{CDCl}_3$ ):  $\delta = 7.48\text{--}6.92$  (10H, m),  $3.35\text{--}0.95$  (28H, m),  $0.93\text{--}0.79$  (3H, m) ppm.  $^{11}\text{B NMR}$  ( $\text{CDCl}_3$ ):  $\delta = -1.68$  (br) ppm.

**Synthesis of PB2A:**  $\text{BF}_3 \cdot \text{OEt}_2$  (0.20 mL, 0.23 g, 1.6 mmol) was added to a solution of **B2A** (0.16 g, 0.16 mmol) and PIFA (0.14 g, 0.32 mmol) in  $\text{CH}_2\text{Cl}_2$  (1.2 mL) at  $-78^\circ\text{C}$ , and the solution was stirred at  $-78^\circ\text{C}$  for 6 h. The solution was poured into MeOH (20 mL) and triethylamine (2 mL) to collect desired polymer by filtration. The precipitate was dissolved in a small amount of THF, and the polymeric products were reprecipitated in a large excess of EtOH. To remove monomer and dimers, this procedure was repeated several times, and then **PB2A** was collected as a purplish red solid (43 mg, 27%).  $M_n = 6,000$ ,  $M_w/M_n = 2.5$ .  $^1\text{H NMR}$  ( $\text{CDCl}_3$ ):  $\delta = 7.97\text{--}6.60$  (34H, m),  $3.44\text{--}0.36$  (31H, m) ppm.  $^{11}\text{B NMR}$  ( $\text{CDCl}_3$ ):  $\delta = -3.13$  (br) ppm.

### Calculation of energy transfer efficiency.

The energy transfer efficiency ( $E_{\text{eff}}$ ) was calculated with the equation 1 according to the previous report (*Macromolecules* **2016**, *49*, 8899).

$$E_{\text{eff}} = (1 - I_{\text{DA}}/I_{\text{D}}) = (1 - \Phi_{\text{DA}}/\Phi_{\text{D}}) \quad (1)$$

where  $I_{\text{DA}}$  is fluorescence intensity of donor (9,10-diphenylanthracene, 813370) in the presence of acceptor (polymer, 193730) and  $I_{\text{D}}$  in the absence of acceptor,  $\Phi_{\text{DA}}$  is quantum yield of donor in the

presence of acceptor and  $\Phi_D$  in the absence of acceptor. In this study, due to low emission intensity, reliable quantum yields were not detectable. Therefore,  $E_{\text{eff}}$  was calculated from the intensities (76%).

## NMR Spectra

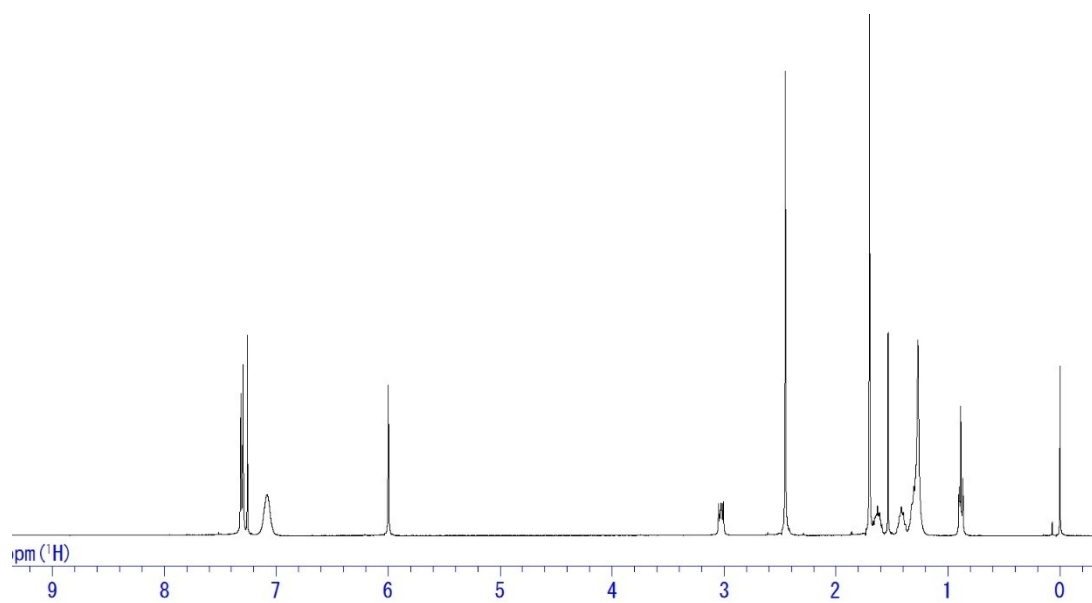

Chart S1.  $^1\text{H}$  NMR spectrum of **B2Br** in  $\text{CDCl}_3$ .

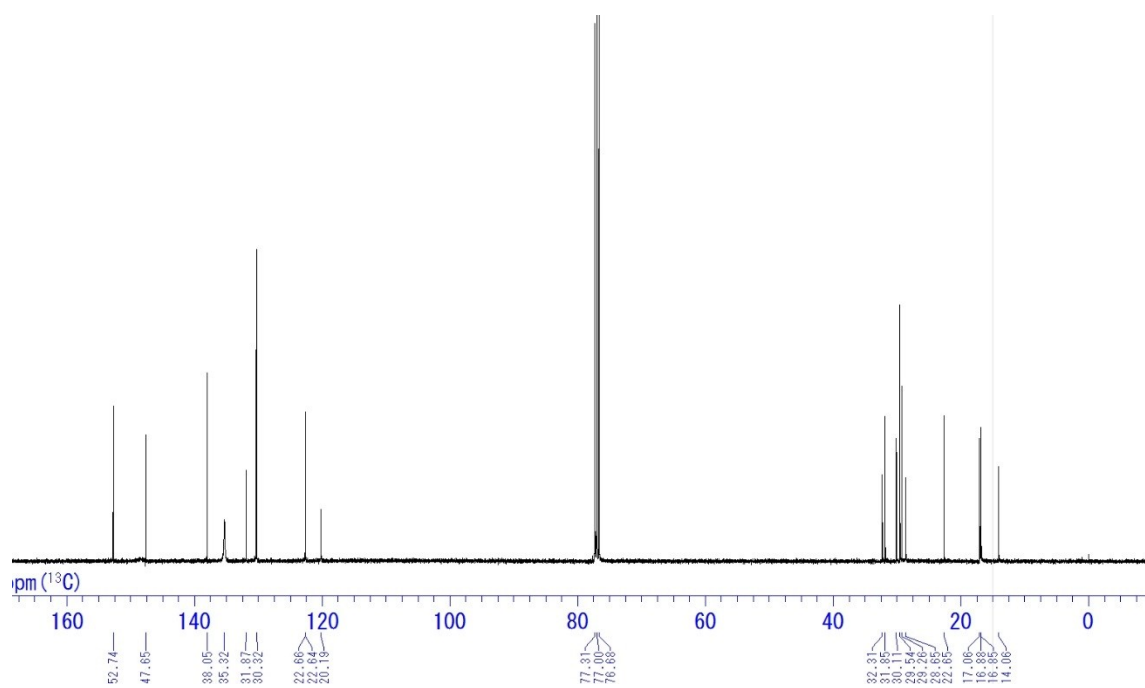

Chart S2.  $^{13}\text{C}$  NMR spectrum of **B2Br** in  $\text{CDCl}_3$ .

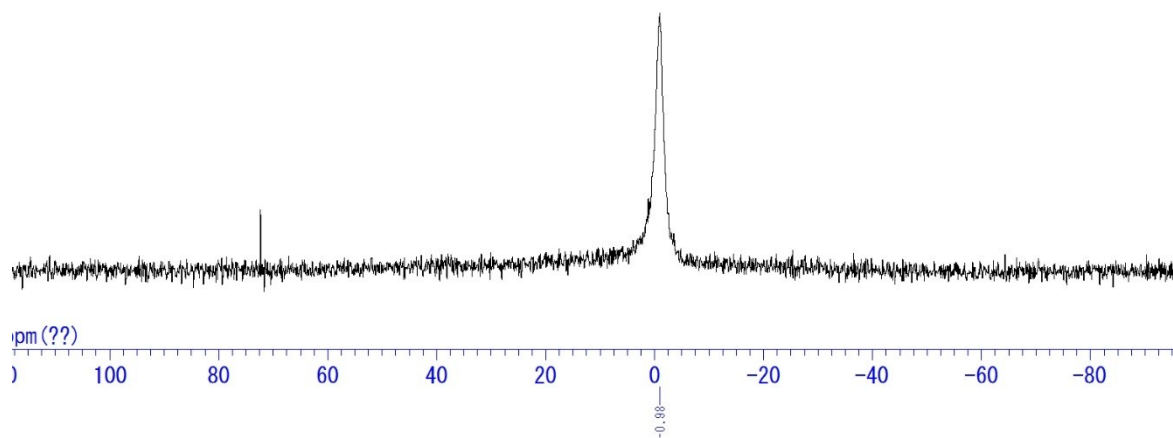

Chart S3.  $^{11}\text{B}$  NMR spectrum of **B2Br** in  $\text{CDCl}_3$ .

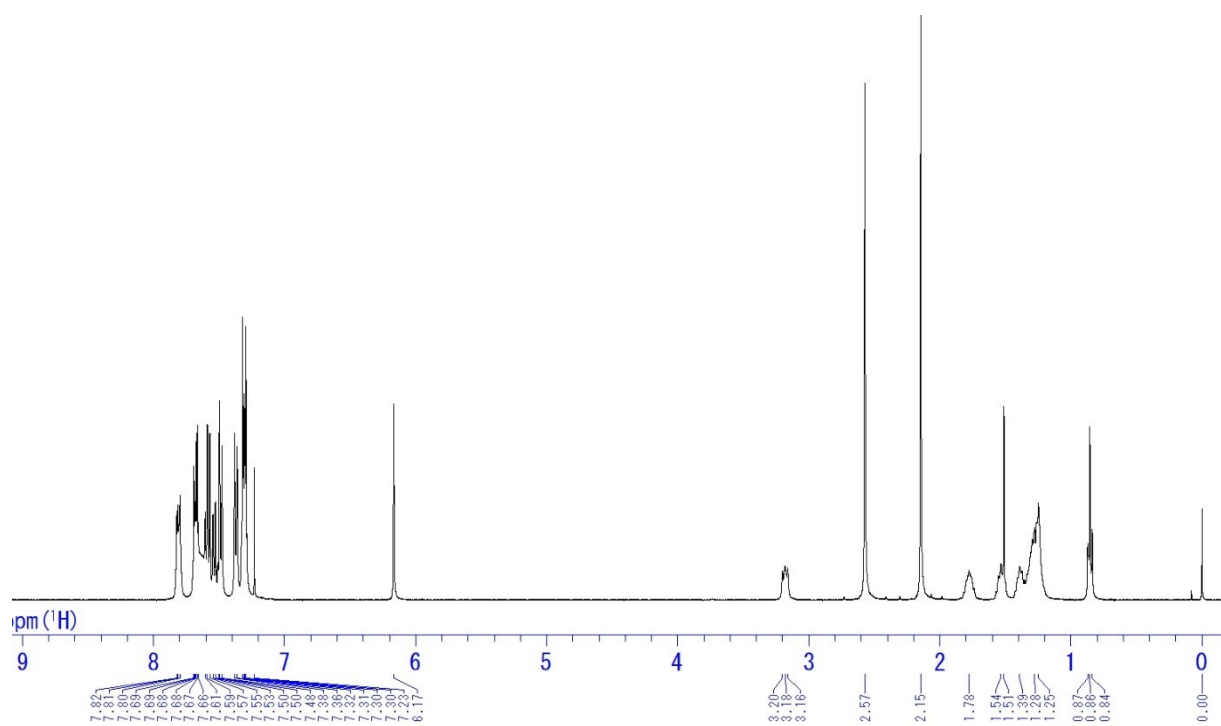

Chart S4.  $^1\text{H}$  NMR spectrum of **B2A** in  $\text{CDCl}_3$ .





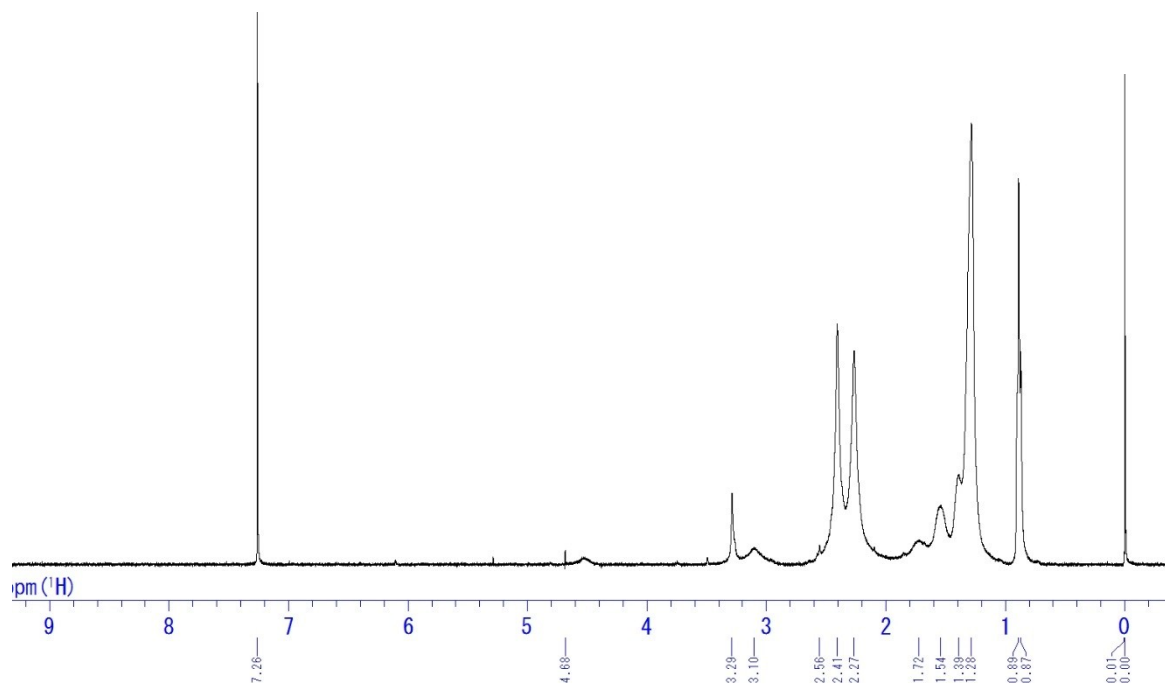

Chart S7. <sup>1</sup>H NMR spectrum of **PB0** in CDCl<sub>3</sub>.

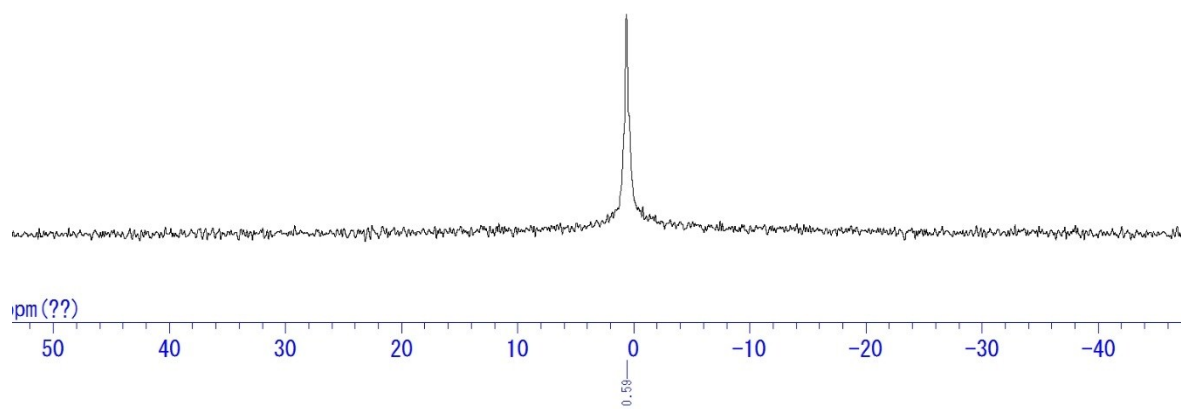

Chart S8. <sup>11</sup>B NMR spectrum of **PB0** in CDCl<sub>3</sub>.

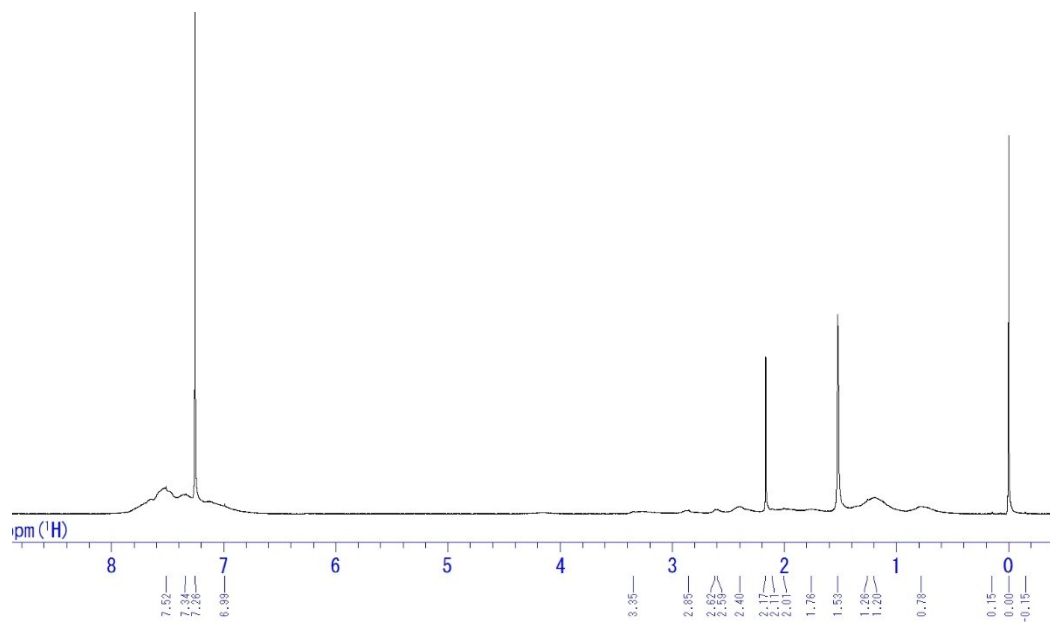

Chart S9.  $^1\text{H}$  NMR spectrum of **PB2** in  $\text{CDCl}_3$ .

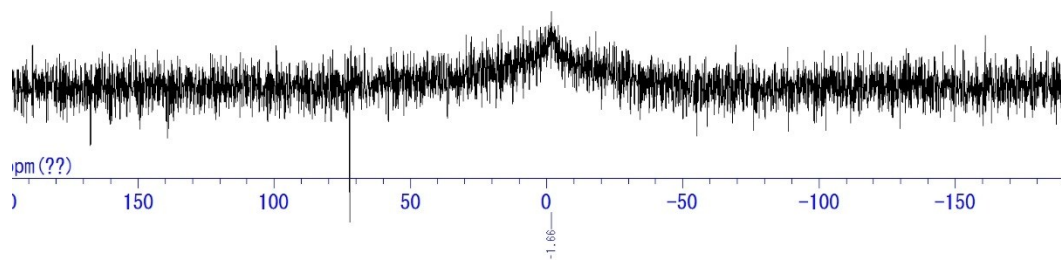

Chart S10.  $^{11}\text{B}$  NMR spectrum of **PB2** in  $\text{CDCl}_3$ .

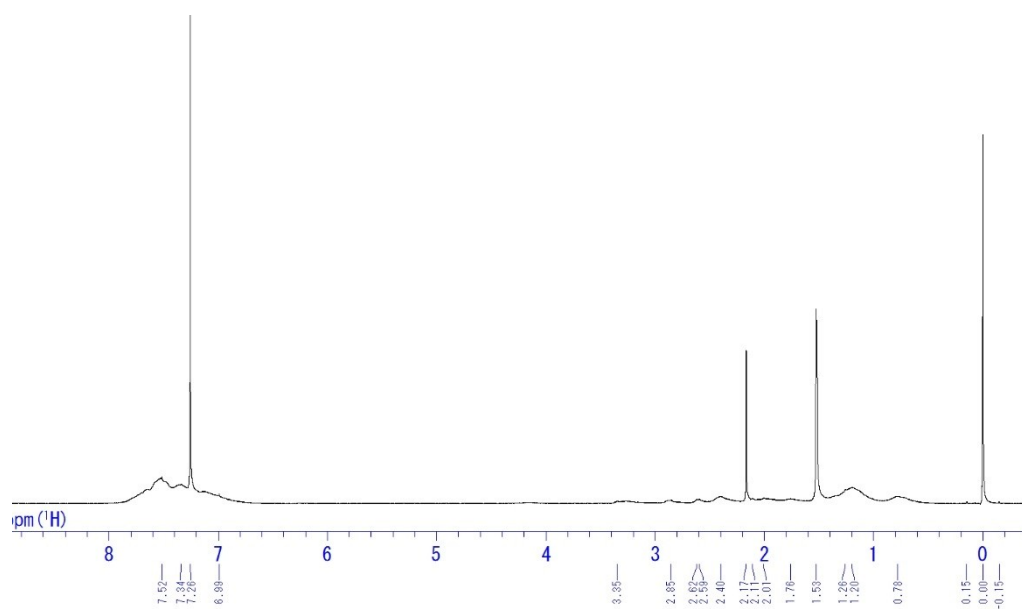

**Chart S11.**  $^1\text{H}$  NMR spectrum of **PB2A** in  $\text{CDCl}_3$ .

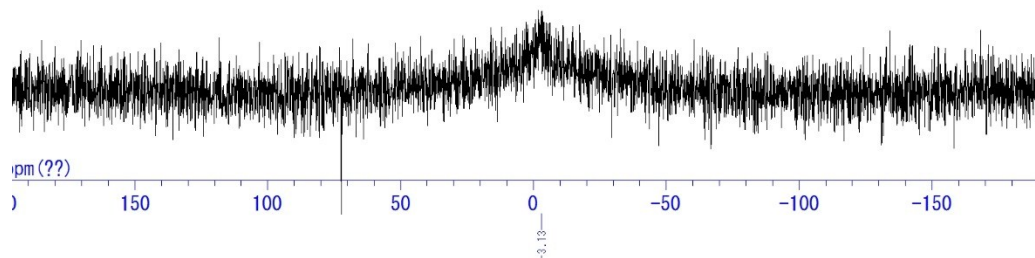

**Chart S12.**  $^{11}\text{B}$  NMR spectrum of **PB2A** in  $\text{CDCl}_3$ .

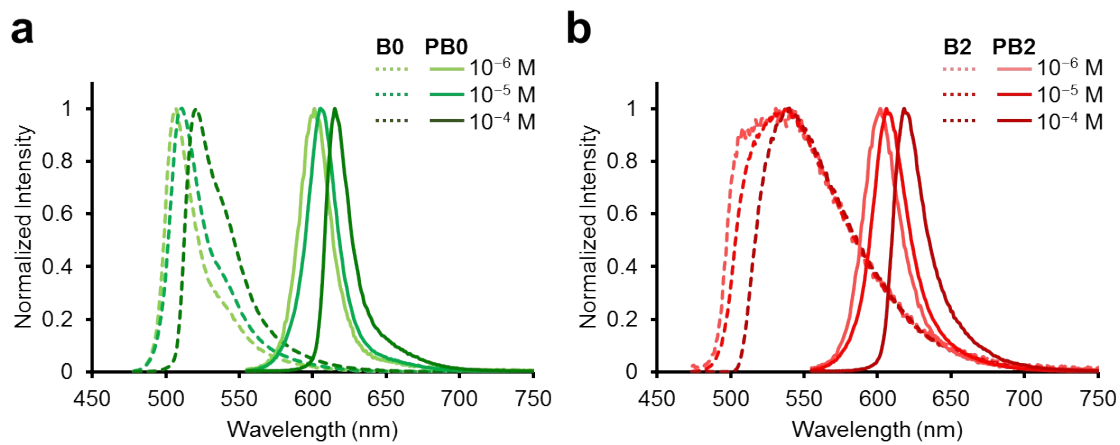

**Figure S1.** Photoluminescence spectra of the compounds and the polymers with various concentrations in chloroform with the excitation light at 540 nm.

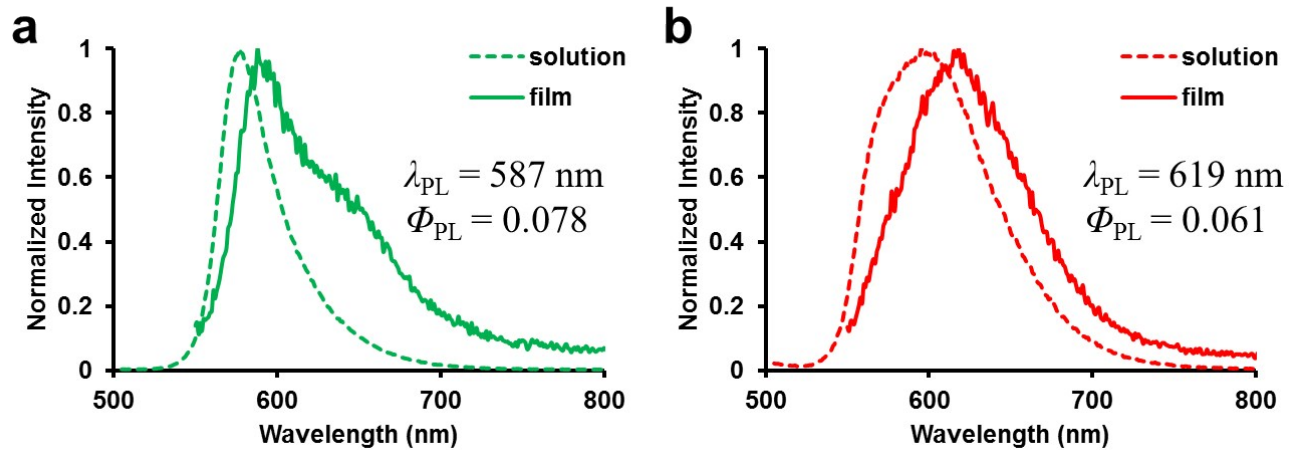

**Figure S2.** Photoluminescence spectra and luminescent data of (a) **PB0** and (b) **PB2** in the film state with the excitation light at 497 nm. The solution samples were obtained with  $10^{-6}$  M concentration.

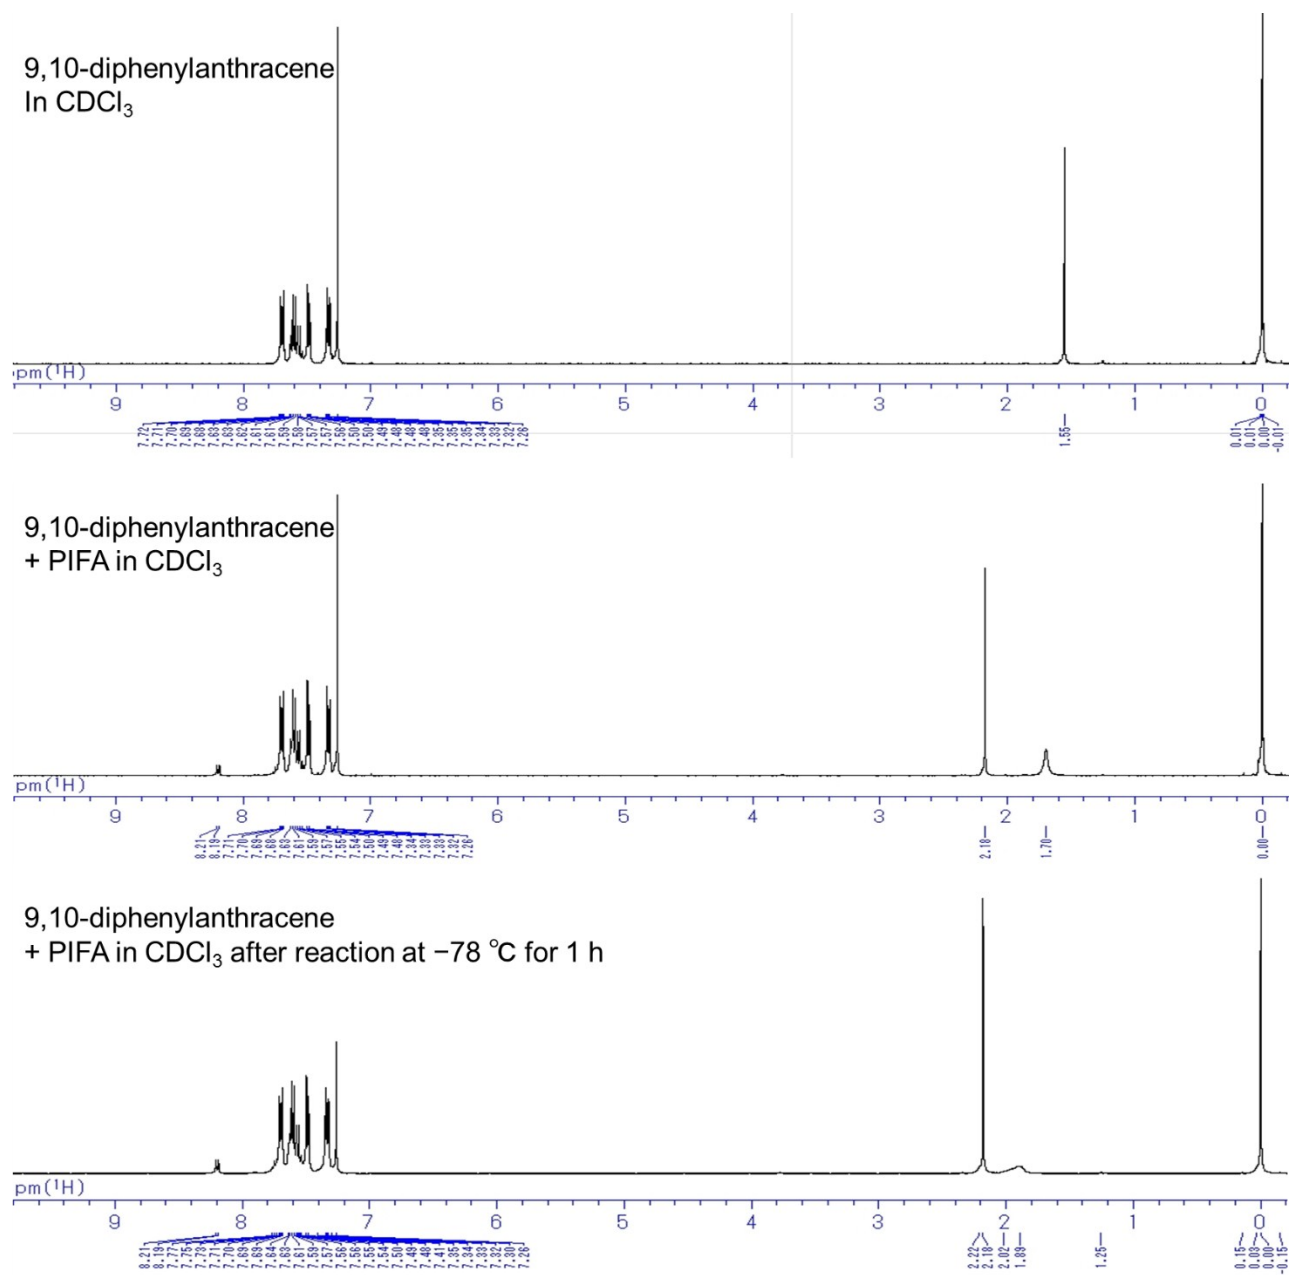

**Figure S3.**  $^1\text{H}$  NMR spectra with the solutions containing 9,10-diphenylanthracene and PIFA before and after reactions at  $-78^\circ\text{C}$  for 1 h in  $\text{CDCl}_3$ .

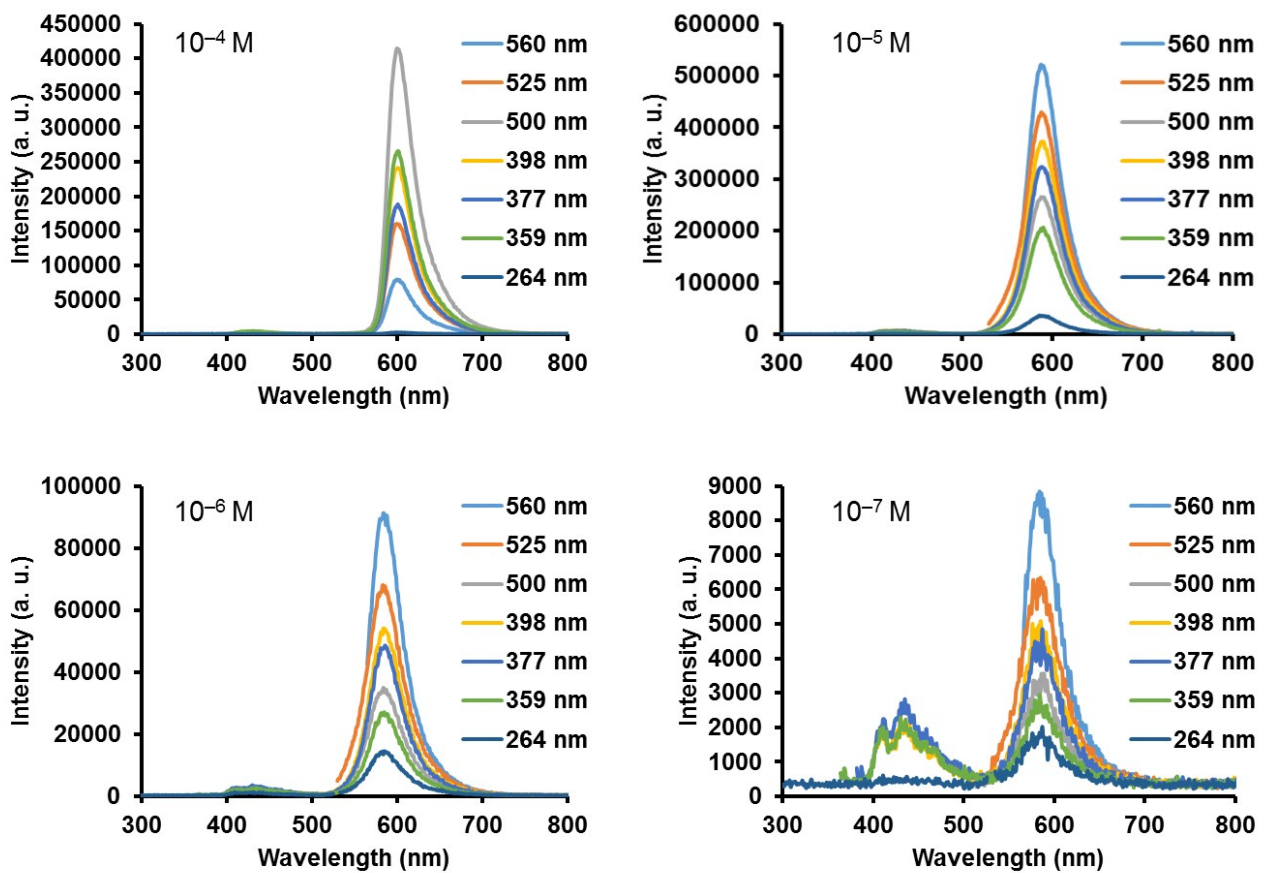

**Figure S4.** Photoluminescence spectra of **PB2A** with various concentrations and excitation wavelengths in chloroform.
